# Supplementary material for: Diet Quality Scores and Cardiometabolic Risk Factors in Mexican Children and Adolescents: A Longitudinal Analysis
Source: MDPI journal article supplement (doi:10.3390/nu14040896), 2022-02-20
Supplement: s1 [file s1]

**Supplemental Table S1.** Scoring Criteria for Dietary Approaches to Stop Hypertension (DASH) Score [1].

| No | Food groups (gm/day)       | Food included                                                                                                 | Scoring criteria <sup>1</sup>                                                                                                |
|----|----------------------------|---------------------------------------------------------------------------------------------------------------|------------------------------------------------------------------------------------------------------------------------------|
| 1  | Fruits                     | All fruits and fruit juices                                                                                   | Quintile 1 = 1 point;<br>Quintile 2 = 2 points;<br>Quintile 3 = 3 points;<br>Quintile 4 = 4 points;<br>Quintile 5 = 1 points |
| 2  | Vegetables                 | All vegetables except potatoes and legumes                                                                    |                                                                                                                              |
| 3  | Nuts and legumes           | Nuts and peanut butter, dried beans, peas, and tofu                                                           |                                                                                                                              |
| 4  | Whole grains               | Brown rice, whole wheat bread, cooked cereal, whole-grain cereal, other grains, popcorn, wheat germ, and bran |                                                                                                                              |
| 5  | Low-fat dairy <sup>2</sup> | Skim milk, yogurt, and cottage cheese                                                                         |                                                                                                                              |
| 6  | Sodium <sup>3</sup>        | Sum of sodium content of all foods in FFQ                                                                     | Quintile 1 = 5 points;                                                                                                       |
| 7  | Red and processed food     | Beef, pork, lamb, deli meats, organ meats, hot dogs, and bacon                                                | Quintile 2 = 4 points;<br>Quintile 3 = 3 points;                                                                             |
| 8  | Sweetened beverages        | Carbonated and noncarbonated sweetened beverages                                                              | Quintile 4 = 4 points;<br>Quintile 5 = 1 point                                                                               |

<sup>1</sup> Sex- and age-specific quintiles.

<sup>2</sup> The FFQ did not distinguish between low fat and high fat dairy products, so we included all dairy products in one group

<sup>3</sup> Sodium intake was ranked without age or sex stratification.

**Supplemental Table S2.** Scoring Criteria for Alternate Mediterranean Diet (aMedDiet) Score [2].

| No | Food groups<br>(gm/day)                                    | Food included                                                                                                                      | Scoring criteria for 1<br>point                                 |
|----|------------------------------------------------------------|------------------------------------------------------------------------------------------------------------------------------------|-----------------------------------------------------------------|
| 1  | Fruits                                                     | All fruits and juices                                                                                                              | Greater than sex-<br>and age-specific<br>median intake          |
| 2  | Vegetables                                                 | All vegetables except potatoes                                                                                                     |                                                                 |
| 3  | Legumes                                                    | Tofu, string beans, peas, beans                                                                                                    |                                                                 |
| 4  | Nuts                                                       | Nuts, peanut butter                                                                                                                |                                                                 |
| 5  | Whole grains                                               | Whole-grain ready-to-eat cereals, cooked cereals,<br>crackers, dark breads, brown rice, other grains,<br>wheat germ, bran, popcorn |                                                                 |
| 6  | Fish                                                       | Fish and shrimp, breaded fish                                                                                                      |                                                                 |
| 7  | Ratio of<br>monounsaturated<br>to saturated fatty<br>acids | Sum of monounsaturated fatty acids content of all<br>foods in FFQ/ sum of saturated fatty acids content of<br>all foods in FFQ     | Less than or equal to<br>sex- and age-specific<br>median intake |
| 8  | Red and<br>processed food                                  | Hot dogs, deli meat, bacon, hamburger, beef                                                                                        |                                                                 |

**Supplemental Table S3.** Availability of Children’s Dietary Inflammatory Index (C-DII) Sub-components Used in the Current Study [3].

| No | C-DII Sub-components            | Availability |
|----|---------------------------------|--------------|
| 1  | Alcohol (g)                     | ✓            |
| 2  | Vitamin B12 (mcg)               | ✓            |
| 3  | Vitamin B6 (mg)                 | ✓            |
| 4  | Beta Carotene (mcg)             | ✓            |
| 5  | Carbohydrate (g)                | ✓            |
| 6  | Cholesterol (mg)                | ✓            |
| 7  | Energy (kcal)                   | ✓            |
| 8  | Fat (g)                         | ✓            |
| 9  | Fiber (g)                       | ✓            |
| 10 | Folic Acid (mcg)                | ✓            |
| 11 | Iron (mg)                       | ✓            |
| 12 | Magnesium (mg)                  | ✓            |
| 13 | Monounsaturated fatty acids (g) | ✓            |
| 14 | Niacin (mg)                     | ✓            |
| 15 | Protein (g)                     | ✓            |
| 16 | Polyunsaturated fatty acids (g) | ✓            |
| 17 | Riboflavin (mg)                 | ✓            |
| 18 | Saturated Fat (g)               | ✓            |
| 19 | Selenium (mcg)                  | ✓            |
| 20 | Thiamin (mg)                    | ✓            |
| 21 | Vitamin A (RE)                  | ✓            |
| 22 | Vitamin C (mg)                  | ✓            |
| 23 | Vitamin D (mcg)                 | X            |
| 24 | Vitamin E (mg)                  | ✓            |
| 25 | Zinc (mg)                       | ✓            |

## References

1. Fung, T.T.; Chiuve, S.E.; McCullough, M.L.; Rexrode, K.M.; Logroscino, G.; Hu, F.B. Adherence to a DASH-style diet and risk of coronary heart disease and stroke in women. *Arch Intern Med* **2008**, *168*, 713-720, doi:10.1001/archinte.168.7.713.
2. Fung, T.T.; McCullough, M.L.; Newby, P.K.; Manson, J.E.; Meigs, J.B.; Rifai, N.; Willett, W.C.; Hu, F.B. Diet-quality scores and plasma concentrations of markers of inflammation and endothelial dysfunction. *Am J Clin Nutr* **2005**, *82*, 163-173, doi:10.1093/ajcn.82.1.163.
3. Khan, S.; Wirth, M.D.; Ortaglia, A.; Alvarado, C.R.; Shivappa, N.; Hurley, T.G.; Hebert, J.R. Design, Development and Construct Validation of the Children's Dietary Inflammatory Index. *Nutrients* **2018**, *10*, 993, doi:10.3390/nu10080993.
